# Supplementary material for: Oncolytic adenovirus drives specific immune response generated by a poly-epitope pDNA vaccine encoding melanoma neoantigens into the tumor site
Source: PubMed Central journal article supplement (PMC6621971; doi:10.1186/s40425-019-0644-7), 2019-07-10
Supplement: 40425_2019_644_MOESM1_ESM.pdf [file 40425_2019_644_MOESM1_ESM.pdf]

# Oncolytic adenovirus drives specific immune response generated by a poly-epitope pDNA vaccine encoding melanoma neoantigens into the tumor site

Alessandra Lopes<sup>1</sup>, Sara Feola<sup>2</sup>, Sophie Ligot<sup>1</sup>, Manlio Fusciello<sup>2</sup>, Gaëlle Vandermeulen<sup>1</sup>, Véronique Pr at<sup>1#</sup>, Vincenzo Cerullo<sup>2#</sup>

## Supplementary data 1

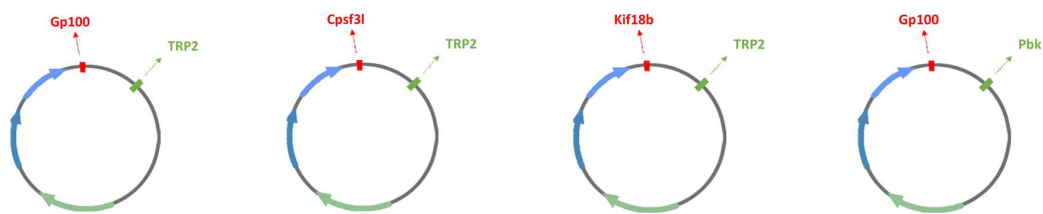

Supplementary data 1: pDNA vaccine design. Four DNA vaccines encoding one CD4 epitope (in red) and one CD8 epitope (in green).
