# Supplementary material for: Oncolytic adenovirus drives specific immune response generated by a poly-epitope pDNA vaccine encoding melanoma neoantigens into the tumor site
Source: PubMed Central journal article supplement (PMC6621971; doi:10.1186/s40425-019-0644-7), 2019-07-10
Supplement: 40425_2019_644_MOESM2_ESM.pdf [file 40425_2019_644_MOESM2_ESM.pdf]

# Oncolytic adenovirus drives specific immune response generated by a poly-epitope pDNA vaccine encoding melanoma neoantigens into the tumor site

Alessandra Lopes<sup>1</sup>, Sara Feola<sup>2</sup>, Sophie Ligot<sup>1</sup>, Manlio Fusciello<sup>2</sup>, Gaëlle Vandermeulen<sup>1</sup>, Véronique Pr at<sup>1#</sup>, Vincenzo Cerullo<sup>2#</sup>

## Supplementary data 2

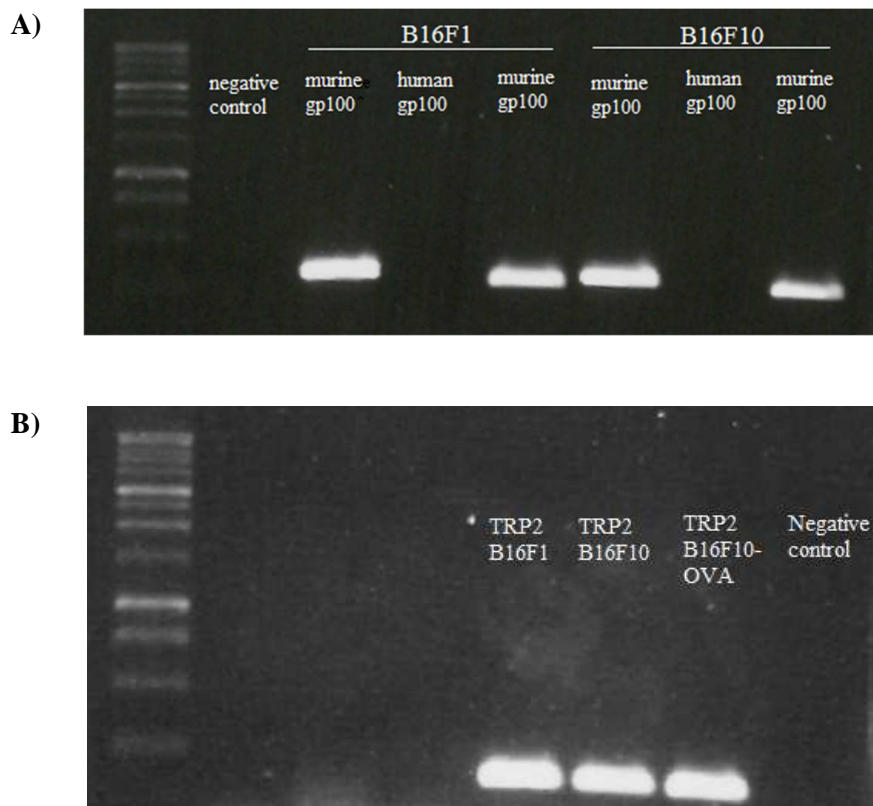

*Supplementary data 2: Expression of TRP2 and murine gp100 in B16F1 melanoma cell line.*

A) Expression of murine and human gp100 in B16F1 and B16F10 (used as a positive control). In the second line, a negative control for the primers has been performed. Ladder of 1 Kb.

B) Expression of TRP2 in B16F1, B16F10 and B16F10-OVA cells (used as a positive control). In the last line, a negative control for the primers has been performed. Ladder of 1Kb.
